# Supplementary material for: An ethnographic study of initiation schools among the Bakgatla ba ga Kgafela at Mochudi (1874-1988)
Source: MDPI journal article supplement (doi:10.3390/microorganisms9061128), 2001-01-01
Supplement: s1 [file s1]

# Methods for Additional Screening of Samples Yielding Only 18S rRNA Gene Amplicon in Initial Multiplex:

Samples which yielded only an 18S rRNA gene amplicon in the initial multiplex were further screened with additional PCRs using the sxtA4 primer pair 166F/680R. 166F targets a conserved region within sxtA4 of both *Pyrodinium* and *Alexandrium* spp (see sequence alignments under “sxtA4 Primer Variability” below). As the initial multiplex PCR was performed in the same tube that contained the single cell, all genomic DNA was still present in the tube for subsequent PCRs. These additional PCRs utilized as template the original multiplex PCR prepared as follows: 2 ul of a 1:5 dilution of the original multiplex; 20 ul undiluted; 2ul undiluted; 14 ul cleaned PCR following the genomic DNA clean-up method of the GeneClean Turbo Clean-Up kit (MoBio). The PCRs that utilized 2 ul of a 1:5 dilution of the original multiplex PCR as template were the equivalent of the nested PCR used to screen the multiplex PCRs that yielded bands indicative of 18S rRNA gene and *sxtA4*. PCRs were conducted in 25 ul volumes using the conditions and thermocycling conditions described for the nested PCRs performed with the 166F/680R primers on samples that yielded an *sxtA4* amplicon in the initial multiplex. PCRs were also performed on the initial multiplex samples that yielded only the 18S rRNA gene amplicon using the F1/680R primers alone using 2 ul undiluted and 2 ul of a 1:5 dilution of the original PCR as template. Reagents and thermocycling conditions were the same as those used for the 166F/680R nested PCR.

Table S1. STX congeners detected in toxic *P. bahamense* lab isolate from the Indian River Lagoon.

| ESF ID # | Culture              | Sample Name                                     | Total PST in µg STX eq./L culture by HPLC-FL) | Congeners Present |
|----------|----------------------|-------------------------------------------------|-----------------------------------------------|-------------------|
| 19-468   | Pyrodinium bahamense | 1 = No Copper, High Light, t= 1 day, Day Phase  | 41.28                                         | GTX 5, STX        |
| 19-469   | Pyrodinium bahamense | 2 = 1 uM Cu, High Light, t= 1 day, Day Phase    | 38.44                                         | GTX 5, STX        |
| 19-470   | Pyrodinium bahamense | 3 = 10 uM Cu, High Light, t= 1 day, Day Phase   | 69.34                                         | GTX 5, STX        |
| 19-471   | Pyrodinium bahamense | 4 = No Copper, Low Light, t= 1 day, Day Phase   | 35.84                                         | GTX 5, STX        |
| 19-472   | Pyrodinium bahamense | 5 = 1 uM Copper, Low Light, t= 1 day, Day Phase | 32.47                                         | GTX 5, STX        |
| 19-473   | Pyrodinium bahamense | 6 = 10 uM Copper, Low Light, t=1 day, Day Phase | 38.74                                         | GTX 5, STX        |
| 19-474   | Pyrodinium bahamense | 7 = No Copper, High Light, t= 5 day, Dark Phase | 130.66                                        | GTX 5, STX        |
| 19-475   | Pyrodinium bahamense | 8 = 10 uM Cu, High Light, t= 5 day, Dark Phase  | 93.39                                         | GTX 5, STX        |
| 19-476   | Pyrodinium bahamense | 9 = 1uM Cu, High Light, t= 5 day, Dark Phase    | 207.87                                        | GTX 5, STX        |
| 19-477   | Pyrodinium bahamense | 10 = No Copper, Low Light, t= 5 day, Dark Phase | 104.30                                        | GTX 5, STX        |
| 19-478   | Pyrodinium bahamense | 11 = 1 uM Cu, Low Light, t= 5 day, Dark Phase   | 106.19                                        | GTX 5, STX        |
| 19-479   | Pyrodinium bahamense | 12 = 10 uM Cu, Low Light, t= 5 day, Dark Phase  | 174.68                                        | GTX 5, STX        |

Methods for Toxin Analysis: Toxin analysis was performed at the State University of New York College of Environmental Science and Forestry. The cellular material was combined with 250 µL of 1% acetic acid in water and freeze-thawed three times to extract PSTs. Extracts were clarified by centrifugation at 16,000×g and the supernatant analyzed in triplicate using HPLC-Fluorescence with post-column chemical oxidation to determine PSTs. All toxins were quantified in STX equivalents, using STX standards acquired from Canada’s National Research Council, as well as secondary in-house standards. The method detection limit was 0.48-0.58 µg STX eq/L, which is comparable or better than other established methods. Two PST congeners were evident in the samples. Identity was determined by matching retention times of standards, including GTX 1, 2, 3, 4, 5, dcGTX 2,3, C1/C2, STX, dcSTX, NEO, and LWTX-1,2,3,5,6.

Table S2. Percent Identity between two representative sequences from clone sequences of individual *P. bahamense* cells and published *P. bahamense* sequences.

|                    | LW24_7 (-15bp)** | LW24_1      | PR46_6 (-15)** | PR46_9      |
|--------------------|------------------|-------------|----------------|-------------|
| MN431957.1*        | 95% (358bp)      | 98% (358bp) | 95% (358 bp)   | 99% (358bp) |
| GBXF01000001.1 TSA | 96% (502bp)      | 98% (517bp) | 96% (502bp)    | 99% (517bp) |

\*MN431957.1 is a 358 bp sequence in GenBank.

\*\* indicates 15 bp deletion in sequence

sxtA4 Primer Variability: The following representative sequences illustrate the sequence differences in the sxtA4F1 and sxtA4166F primers between *Pyrodinium* and *Alexandrium* spp. *Pyrodinium* sequences include clone sequences from both genomic DNA and cDNA from the toxic lab isolate amplified with the 007F/sxtA4680R primers. Yellow highlight indicates sxtA4F1 primer binding region; base differences between *Pyrodinium* and *Alexandrium* are indicated in bold, with *Pyrodinium* sequence in brackets. Green highlight indicates sxtA4166F primer region.

>IRL\_sxtADNA\_1\_007/680R

ATGCTCAACATGGGAGTCATCCCGAGCCTCGTGGGCGAGAGCGGGTTCCTCCTCCTGGACAT  
AAACGCCCATGACTGCGTGCAGACGGCCGCCAGGCTCTGCAAGAAGGGCGCCACCGTCGTG  
CGCCTGAAGCAC **AACGACATGAAGCAGCTCGA** GCGCGTGGTCTCGTCGATCCCGGAGGCGG  
CCGACATCACCTACGTGTGCGACGGCGTTTACTCCACGGACGGAGAGCTCGCCGACTTGCCC  
GCCATATGTGCTTGTGTTGAGGCCACGCGGGGCCAAGATACTCGTAGACGACTCA **CATGGCTG**  
**CGGCGTTCTTG** GCCGCAACCCCGACTCGGAACAACCCCTCGGATATGGTGGCGGCGGCGTGC  
TCAAGTACTTCGGGCTGGACTATGCGGAGAACAACATCATCTACGCCGGCCAGCTGAGCAA  
GGCGTTCAATTGCCCCGGCGGATTTCGTGCGCTGCGCACGCGAGACCGACGAGAAGTTCGGC  
ATTCTGAACCTGGCCAAGAAGTTCGAACACGCTCGTGTTCACAGGCCCGATCTGTACTGCCGG  
CCTGTCGAGTGCGAAGACGACCCTCGACCTCAACGCCGCTGAGGGGGACCTTCAGCGCAAG  
CGGCTTCTGGAGGCGACCCTCGGATTCTGCGAGGGGCTCAAGGCACTCGGGTGCCCCACAC  
CTACCACGATTCCCCGTCGTCAACATCTACTGGACCCCGGTCCAGGTGTGCGCAGAGGTGT  
ACAGGGAGCTGATGAGCGCGAGGCAGGGCGCGTTCCAGCGGGGCGTCATCACGACCCCTAT  
GTGGTACCCCATCTAG

>IRL\_sxtA4DNA\_2\_007/680R

ATGCTCAACATGGGAGTCATCCCGAGCCTCGTGGGCGAGAGCGGGTTCCTCCTCCTGGACAT  
AAACGCCCATGACTGCGTGCAGACGGCCGCCAGGCTCTGCAAGAAGGGCGCCACCGTCGTG  
CGCCTGAAGCAC **AACGACATGAAGCAGCTCGA** GCGCGTGGTCTCGTCGATCCCGGAGGCGG  
CCGACATCACCTACGTGTGCGACGGCGTTTACTCCACGGACGGAGAGCTCGCCGACTTGCCC  
GCCATATGTGCTTGTGTTGAGGCCACGCGGGGCCAAGATACTCGTAGACGACTCA **CATGGCTG**  
**CGGCGTTCTTG** GCCGCAACCCCGACTCGGAACAACCCCTCGGATATGGTGGCGGCGGCGTGC  
TCAAGTACTTCGGGCTGGACTATGCGGAGAACAACATCATCTACGCCGGCCAGCTGAGCAA  
GGCGTTCAATTGCCCCGGCGGATTTCGTGCGCTGCGCACGCGAGACCGACGAGAAGTTCGGC  
ATTCTGAACCTGGCCAAGAAGTTCGAACACGCTCGTGTTCACAGGCCCGATCTGTACTGCCGG  
CCTGTCGAGTGCGAAGACGACCCTCGACCTCAACGCCGCTGAGGGGGACCTTCAGCGCAAG  
CGGCTTCTGGAGGCGACCCTCGGATTCTGCGAGGGGCTCAAGGCACTCGGGTGCCCCACAC  
CTACCACGATTCCCCATCGTCAACATCTACTGGACCCCGGTCCAGGTGTGCGCAGAGGTGT  
ACAGGGAGCTGATGAGCGCGAGGCAGGGCGCGTTCCAGCGGGGCGTCATCACGACCCCTAT  
GTGGTACCCCATCTAG

>IRL\_sxtA4DNA\_3\_007/680R

ATGCTCAACATGGGAGTCATCCCGAGCCTCGTGGGCGAGAGCGGGTTCCTCCTCCTGGACAT  
AAACGCCCATGACTGCGTGCAGACGGCCGCCAGGCTCTGCAAGAAGGGCGCCACCGTCGTG  
CGCNTGAAGCAC **AACGACATGAAGCAGCTCGA** GCGCGTGGTCTCGTCGATCCCGGAGGCGG  
CCGACATCACCTACGTGTGCGACGGCGTTTACTCCACGGATGGAGAGCTCGCCGACTTGCCC  
GCCATATGTGCTTGTTTGAGGGCCACGCGGGGCCAAGATACTCGTAGACGACTCA **CATGGCTG**  
**CGGCGTTCTTG** GCCGCAACCCCGACTCGGAACAACCCCTCGGATATGGTGGCGGGCGGCGTCG  
TCAAGTACTTCGGGCTGGACTATGCGGAGAACAACATCATCTACGCCGGCCAGCTGAGCAA  
GGCGTTCAATTGCCCCGGCGGATTTCGTTCGGCTGCGCACGCGAGACCGACGAGAAGTTCGGC  
ATTCTGAACTTGGCCAAGAAGTTCGAACACGCTCGTGTTTCGACGGCCCGATCTGTACTGCCGG  
CCTGTCGAGTGCGAAGACGACCCTCGACCTCAACGCCGCTGAGGGGGACCTTCAGCGCAAG  
CGGCTTCTGGAGGCGACCCTCCGATTCTGCGAGGGGCTCAAGGCACTCGGGTGCCCCACAC  
CTACCACGGATTCCCCATCGTCAACATCTACTGGACCCCGGTCCAGGTGTGCGCAGAGGTGT  
ACAGGGAGCTGATGAGCGCGAGGCAGGGCGCGTTCCAGCGGGGCGTCATCACGACCCCTAT  
GTGGTACCCCATCTAG

>IRL\_sxtA4DNA\_4\_007/680R

ATGCTCAACATGGGAGTCATCCCGAGCCTCGTGGGCGAGAGCGGGTTCCTCCTCCTGGACAT  
AAACGCCCATGACTGCGTGCAGACGGCCGCCAGGCTCTGCAAGAAGGGCGCCACCGTCGTG  
CGCCTGAAGCAC **AACGACATGAAGCAGCTCGA** GCGCGTGGTCTCGTCGATCCCGGAGGGGG  
CCGACATCACCTACGTGTGCGACCGCGTTTATTCCACGGACGGAGAGCTTGCCGACTTGCCC  
GCCATATGTGCTTGTTTGAGGGCCACGCGGGGCCAAGATACTCGTAGACGACTCG **CATGGCTG**  
**CGGCGTTCTTG** GCCGCAACCCCGACTCGGAACGACCCCTCGGATATGGTGGCGGGCGGCGTCG  
TCAAGTACTTCGGGCTGGACTACGCGGAGAATAACATTTACGCCGGGCAACTTAGCAAGGC  
GTTCAATTGCCCCGGCGGATTTCGTTCGGCTGCGCATGCGAGACCAACGAGTAGCTCGGCATT  
TAACTTGGCCAAGAAGTTCGAACACGCTCGTGTTACAGGCCCGATCTGTACTGCCGGCCTG  
TCGAGTGCGAAGACGACCCTCGACCTCAACGCCGCTGAGGGGGGCCTTCAGCGCAAGCGGC  
TTCTGGAGACGACCTCGGATTCTGCGAGGGGCTCAAGGCACTCGGGTGCCCCACACCTACCA  
CGGATTCCCCATCGTCAACATCTACTGGACCCCGGTTCGAGACGTGCGCAGAGGTGCACAGG  
GAGCTGATGAGCGCGAGACAGGGCGCGTTCCAGCGGGGCGTCATCACGACCCCTATGTGGT  
ACCCCATCTAG

>IRL\_sxtA4\_DNA\_5\_007/680R

ATGCTCAACATGGGAGTCATCCCGAGCCTCGTGGGCGAGAGCGGGTTCCTCCTCCTGGACAT  
AAACGCCCATGACTGCGTGCAGACGGCCGCCAGGCTCTGCAAGAAGGGCGCCACCGTCGTG  
CGCCTGAAGCAC **AACGACATGAAGCAGCTCGA** GCGCGTGGTCTCGTCGATCCCGGAGGCGG  
CCGACATCACCTACGTGTGCGACGGCGTTTACTCCACGGACGGAGAGCTCGCCGACTTGCCC  
GCCATATGTGCTTGTTTGAGGGCCACGCGGGGCCAAGATACTCGTAGACGACTCA **CATGGCTG**  
**CGGCGTTCTTG** GCCGCAACCCCGACTCGGAACAACCCCTCGGATATGGTGGCGGGCGGCGTCG  
TCAAGTACTTCGGGCTGGACTATGCGGAGAACAACATCATCTACGCCGGCCAGCTGAGCAA  
GGCGTTCAATTGCCCCGGCGGATTTCGTTCGGCTGCGCACGCGAGACCGACGAGAAGTTCGGC  
ATTCTGAACTTGGCCAAGAAGTTCGAACACGCTCGTGTTACAGGCCCGATCTGTACTGCCGG  
CCTGTCGAGTGCGAAGACGACCCTCGACCTACCGCCGCTGAGGGGGACCTTCAGCGCAAG  
CGGCTTCTGGAGGCGACCCTCGGATTCTGCGAGGGGCTCAAGGCACTCGGGTGCCCCACAC  
CTACCACGGATTCCCCATCGTCAACATCTACTGGACCCCGGTCCAGGTGTGCGCAGAGGTGT

ACAGGGAGCTGATGAGCGCGAGGCAGGGCGCGTTCCAGCGGGGCGTCATCACGACCCCTAT  
GTGGTACCCCATCTAG

>IRL\_sxtA4cDNA\_1\_007/680R

ATGCTCAACATGGGAGTCATCCCGAGCCTCGTGGGCGAGAGCGGGTTCCTCCTCCTGGACAT  
AAACGCCCATGACTGCGTGCAGACGGCCGCCAGGCTCTGCAAGAAGGGCGCCACCGTCGTG  
CGCCTGAAGCAC**AACGACATGAAGCAGCTCGA**GCGCGTGGTCTCGTCGATCCCGGAGGCGG  
CCGACATCACCTACGTGTGCGACGGCGTTTACTCCACGGACGGAGAGCTCGCCGACTTGCCC  
GCCATATGTGCTTGTTTGAGGGCCACGCGGGGCCAAGATACTCGTAGACGACTCA**CATGGCTG**  
**CGGCGTTCTTG**GCCGCAACCCCGACTCGGAACAACCCCTCGGATATGGTGGCGGCGGCGTCTG  
TCAAGTACTTTGGGCTGGACTACGCGGAGAACAACATCATCTACGCCGGCCAGCTGAGCAA  
GGCGTTCAATTGCCCCGGCGGATTTCGTGCGCTGCGCACGCGAGACCGACGAGAAGTTCGGC  
ATTCTGAACCTGGCCAAGAAGTTCGAACACGCTCGTGTTACAGGCCCGATCTGTACTGCCGG  
CCTGTCGAGTGCGAAGACGACCCTCGACCTCAACGCCGCTGAGGGGGACCTTCAGCGCAAG  
CGGCTTCTGGAGGCGACCCTCGGATTCTGCGAGGGGCTCAAGGCACTCGGGTGCCCCACAC  
CTACCACGGATTCCCCATCGTCAACATCTACTGGACCCCGGTCCAGGTGTGCGCAGAGGTGT  
ACAGGGAGCTGATGAGCGCGAGGCAGGGCGCGTTCCAGCGGGGCGTCATCACGACCCCTAT  
GTGGTACCCCATCTAG

>IRL\_sxtA4cDNA\_2\_007/680R

ATGCTCAACATGGGAGTCATCCCGAGCCTCGTGGGCGAGAGCGGGTTCCTCCTCCTGGACAT  
AAACGCCCATGACTGCGTGCAGACGGCCGCCAGGCTCTGCAAGAAGGGCGCCACCGTCATG  
CGCCTGAAGCAC**AACGACATGAAGCAGCTCGA**GCGCGTGGTCTCGTCGATCCCGGAGGCGG  
CCGACATCACCTACGTGTGCGACGGCGTTTACTCCACGGACGGAGAGCTCGCCGACTTGCCC  
GCCATATGTGCTTGTTTGAGGGCCACGCGGGGCCAAGATACTCGTAGACGACTCA**CATGGCTG**  
**CGGCGTTCTTG**GCCGCAACCCCGACTCGGAACAACCCCTCGGATATGGTGGCGGCGGCGTCTG  
TCAAGTACTTTGGGCTGGACTACGCGGAGAACAACATCATCTACGCCGGCCAGCTGAGCAA  
GGCGTTCAATTGCCCCGGCGGATTTCGTGCGCTGCGCACGCGAGACCGACGAGAAGTTCGGC  
ATTCTGAACCTGGCCAAGAAGTTCGAACACGCTCGTGTTACAGGCCCGATCTGTACTGCCGG  
CCTGTCGAGTGCGAAGACGACCCTCGACCTCAACGCCGCTGAGGGGGACCTTCAGCGCAAG  
CGGCTTCTGGAGGCGACCCTCGGATTCTGCGAGGGGCTCAAGGCACTCGGGTGCCCCACAC  
CTACCACGGATTCCCCATCGTCAACATCTACTGGACCCCGGTCCAGGTGTGCGCAGAGGTGT  
ACAGGGAGCTGATGAGCGCGAGGCAGGGCGCGTTCCAGCGGGGCGTCATCACGACCCCTAT  
GTGGTACCCCATCTAG

>GBXF01000001.1 TSA: Pyrodictum bahamense var. compressum TSA:Pbc\_sxtA4

**AACGACATGAAGCAGCTCGA**GCGCGTGGTCTCGTCGATCCCGGAGGGGGCCGACATCACCT  
ACGTGTGCGACGGCGTTTACTCCACGGACGGAGAGCTCGCCGACTTGCCCGCCATATGTGCT  
TGTTTGAGGCCACGCGGGGCCAAGATACTCGTAGACGACTCA**CATGGCTGCGGCGTTCTTG**G  
CCGCAACCCCGACTCGGAACAACCCCTCGGATATGGTGGCGGCGGCGTCTGTAAGTACTTCG  
GGCTGGACTACGCGGAGAACAACATCATCTACGCCGGCCAGCTGAGCAAGGCGTTCAATTC  
GCCCCGGCGGATTTCGTGCGCTGCGCACGCGAGACCGACGAGAAGTTCGGCATTCTGAACCTTG  
GCCAAGAAGTTCGAACACGCTCGTGTTACAGGCCCGATCTGTACTGCCGGCCTGTCGAGTGC  
GAAGACGACCCTCGACCTCAACGCCGCTGAGGGGGACCTTCAGCGCAAGCGGCTTCTGGAG  
GCGACCCTCGGATTCTGCGAGGGGCTCAAGGCACTCGAGTGCCCCACACCTACCACGGATT  
CCCCAT

CGTCAACATCTACTGGACCCCGGTCCAGGTGTGCGCAGAGGTGTACAGGGAGCTGATGAGC  
GCGAGGCAGGGCGCGTTCCAGCGGGGCGTCATCACGACCCCTATGTGGTACCCCATCTAG

>JF343394.1 *Alexandrium fundyense* strain CCMP1719 clone L38

GCTCAACATGGGAGTCATCCCGAGCCTCGTGGGCGAGAGCGGGTTCCTCCTCCTGGACATAA  
ACGCCCACGACTGCGTGCAGACGGCCGCCAGGCTCTGCAAGAAGGGCGCCACCGTGGTGCG  
CCTGAAGCAC **AACGACG**[A]**C**[T]**GG**[A]**AGCAGCTCGA**GCACATGCTCTCGTCGATCCCGCAG  
GGGGCCGACATCACCTACGTGTGCGACGGCGTGTACTCCACGGACGGAGAGCTCGCCGACT  
TGCCCGCCATATGTGCTTGTGTTGAGGCCGCGCGGGGCCAAGATACTCGTAGACGACTCG **CAT**  
**GGCTGCGGCGTTCTTG**GCCGCAACCCCGACTCGGAGCAACCCTTCGGGTATGGTGGCGGCGG  
CGTCGTCGAGTACTTCGGGCTGGACTACGCGGAGAACAACATCATCTACGCCGGGCAGCTG  
AGCAAGGCGTTCAATTGCCCCGGCGGATTCGTCGGCTGTGCGCGCGAGACCGACGAGAAGT  
TCGGCATTCTGAATTGGCCAAGAACTCAAACACACTCGTGTTACAGGGCCGATCTGTACT  
GCCGGCCTGTCGAGTGCGATGACGACCCTCGACCTCAACGCCGCCGAGGGGGACCTTCAGC  
GCAAGCGGCTTCTGGCGGCGACCCCTCGAATTCTGCGAGGGGCTCAAGGCGCTCGGGTGCCCC  
CACACCTACCACGGGTTCCTCCATCGTCAACATCTACTGGACCCCGGTTCGAGGTGTGCGCAGA  
GGTGTACAGGGAGCTGATGAGCGCGAGGCAGGGCGCGTTCCAGCTGGGCGTCGTCACGACC  
CCCATGTGGCACCCCATCGCCCCAAAGGGCCACGAGATACTGCGCTTCCAGTTCACGTCGCT  
CCACGACGAGGCCGCCGTGCGCCACATCCTCGTGATCCTCGAGGACCTGATCAAGCGCTACC  
CGCCCTCCGCCGTGCCGCCGCGCATCTGATCGGCTGCCCGAGCCGCAGGACCAGCGCCGCTC  
ATCCAGGGGTGTTTAAGGGATTGTTGAGTCTTTTCAATCTAGTCAGCGTGTTTTTAATGTG  
CAAGCAGCAAGGGTCAGGCGGATTCTGGGCTTGTACACCAAGGGCCAGGCAGGTTTTGGCT  
GCCGCCGTTTTGATCCTGCTGTGTTGTCGTAGCGTGCAAGCAGCAAGGGTCAGGCGGAGTCT  
GGGCTTGTACACCAAGGGCCAGGCAGGTTTTGGCTGCCGCCGTTTTGATCCTGCTGTGTTGT  
GGTAGCATGCAAGCAGCAAGGGTCAGGCGGATTTTGTGGCTTTGCTGATCCTGATCCAAGGT  
ATGACCAGCCATGGCGCATCATCGCGTCTAATGTAGCGCCTGTCCATGTCTGCCATCTTAGCT  
GGTCACTATTTGCATCAACACTCGCAAGGTACGCGTCTGCTACGCACAGGTGACAATTGACA  
TTGTGGATCGAGCCACGGAAGGGAGAAAAAAAAAAAAAAAAA

>JF343393.1 *Alexandrium fundyense* strain CCMP1719 clone L37

TGCTCAACATGGGAGTCATCCCGAGCCTCGTGGGCGAGAGCGGGTTCCTCCTCCTGGACATA  
AACGCCCACGACTGCGTGCAGACGGCCGCCAGGCTCTGCAAGAAGGGCGCCACCGTGGTGCG  
GCCTGAGGCAC **AACGACG**[A]**C**[T]**GG**[A]**AGCAGCTCGA**GCACATGCTCTCGTCGATCCCGCA  
GGGGGCCGACATCACCTACGTGTGCGACGGCGTGTACTCCACGGACGGAGAGCTCGCCGAC  
TTGCCCGCCATATGTGCTTGTCTGAGGCCGCGCGGGGCCAAGATACTCGTAGACGACTCG **CA**  
**TGGT**[C]**TGCGGCGTTCTTG**GCCGCAACCCCGACTCGGAGCAACCCTTCGGGTATGGTGGCGG  
CGGCGTCGTCGAGTACTTCGGGCTGGACTACGCGGAGAACAACATCATCTACGCCGGGCAG  
CTGAGCAAGGCGTTCAATTGCCCCGGCGGATTCGTCGGCTGTGCGCGCGAGACCGACGAGA  
AGTTCGACATTCTGAATTGGCCAAGAACTCGAACACACTCGTGTTACAGGGCCGATCTGT  
ACTGCCGGCCTGTCGAGTGCGATGACGACCCTCGACCTCAACGCCGCCGAGGGGGACCTTCA  
GCGCAAGCGGCTTCTGGCGGCGACCCCCGAATTCTGTGAGGGGCTCAAGGCGCTCGGGTGCG  
CCCCACACCTACCACGGGTTCCTCCATCGTCAACATCTACTGGACCCCGGTTCGAGGTGTGCGC  
AGAGGTGTACAGCGAGCTGATGAGCGCGAGGCAGGGCGCGTTCCAGCTGGGCGTCGTCACG  
ACCCCATGTGGCACCCCATCGCTCCGAAGGGCCACGAGATGCTGCGCTTCCAGTTCACGTC  
GCTCCACGACGAGGCCGCCGTGCGCCACATCCTCGTGATCCTCGAGGACCTGATCAAGCGCT

ACCCGCCCTCCGCCGTGCCGCCGCGCATCTGATCGGCCGCCCGAGCCGCAGGACCAGCGCCG  
CTCATCCAGGGGTTGTTTAAGGGATTGTTTAATCTTCTCAATCTAGTCAGCGTGTTTTTAAT  
GTGCAAGCAGCAAGGGTCAAGCGGATTCTGGGCTTGACACCAAGGGCCAGGCAGGTTTTG  
GCTGCCGCCATTTTGATCCTGCTGTGTTGTCGTAGCGTGCAAGCAGCAAGGGCCAGGCGGAG  
TCTGTGCTTGACACCAAGGGCCAGGCAGGTTTTGGCTGCCGCCGTTTTTATCCGGCTGTGTT  
GTGGTAGCGTGCAAGCAGCAAGGGTCAGGCGGATTGTTGGGCTTTGCTGATCCTGATCCAAG  
GTAAAAAAAAAAAAAAAAAAAAAAAAAAAAA

>JF343351.1 *Alexandrium minutum* strain CCMP1888 clone cl07/03

TGCTCAACATGGGAGTCATCCCGAGCCTGGCGGGCGGGAGCGGGTTCCTCCTCCTGGACATA  
AACGCCACGACTGCGTGACAGACGGCAGCCAGGCTCTGCAAGAAGGGAGTCACCGTCGTGC  
GCCTGAAGCACAAACGACAC[T]GG[A]AGCAGCTCGAGCGCGTGCTCTCGTCGATCCCGGAGG  
GGGCCGACATCACCTACGTGTGCGACGGCGTCTACTCCACGGACGGAGAGCTCGCCGACCT  
GCCCCGCATATGTGCTTGTGTTGAGGCCGCGCGGGGCCAAGATACTCGTGGACGACTCGCACI  
T]GGTTGCGGCGTTCTTGCCGCAACCCCGACTCGGAGCAACCCTTCGGATATGGCGGCGGC  
GGCGTCGTCAAGTACTTCGGGCTGGACTACGCGGAGAACAAATCATCTACGCCGGGCAGC  
TGAGCAAGGCGTTCAATTCGCCCGGCGGATTCTGTGGGCTGCGCACGCGAGACCGACGAGAA  
GTTTCGGCATTCTGAACTTGGCCAAGAACTCGAACACGCTCGTGTTACAGGGCCGATCTGTA  
CTGCCGGCCTGTCGAGTGCGAAGACGACCCTCGACCTCAACTTTGCCGAGGGGGACCGTCAG  
CGCAAGCGGCTTCTTGAGGCGACCCTGGAATTTTGCAGGGGGCTCAAGGCGCTCGGGTGCCC  
CCACACCTACCACGGGTTCCCCATCGTCAACATCTACTGGACCC

Representative 18S rRNA gene sequences for alignment as referred to in the Discussion. “IRL” refers to Indian River Lagoon sequences from this study.

>IRL\_DB

CAGGGCATCCATGTCTTGTAATTGGAATGAATGGAAATTAAACCTCTTTGTAAGTATCGATT  
GGAGGGCAAGTCTGGTGCCAGCAGCCGCGGTAATTCCAGCTCCAATAGCGTATATTAAGTT  
GTTGCGGTAAAAAGCTCGTAGTTGGATTTCTGCTAAGGGTGGCTGGTCCGCCCTCTGGGTG  
AGTATCTGGCACAACCTGAGCATCTTTCTGGAGAACGTAAGTGCACCTTGACTGTGTGGTGCG  
GTATCGAGAACTTTTACTTTGAGGAAATCAGAGTGTTTCAAGCAGGTGTTTGCCTTGAATAC  
ATTAGCATGGAATAATAACATAGGACTTTGGTTCTATTTTGTGTTTCTAGAACGAAAGTA  
ATGATTAATAGGGATAGTTGGGGGCATTCGTATTTAATTGTCAGAGGTGAAATTCTTGATT  
TGTTGAAGACGGACTACTGCGAAAGCATTGCGCAAGGATGTTTTTCATTGATCAAGAACGAAA  
GTTAGGGGATCGAAGACGATCAGATACCGTCCTAGTCTTAACCATAAACCATGCCAACTAGA  
GATTGGAGGCCGTTATTTGTACGATTCTTCAGCACCTTATGAGAAATCGAAGTCTTTGGGT  
CCGGGGGGAGTATGGTCGCAAGGCTGAACTTAAAGGAATTGACGGAAGGGCACCACCAGG  
AGTGGAGCCTGCGGCTTAATTTGACTCAACACGGGGAACTTACCAGGTCCAGACATAATTA  
GGATTGACAGATTGATAGCTCTTTCTTGATTCTATGGGTGGTGGTGCATGGCCGTTCTTAGTT  
GGTGGAGTGATTGTCTGGTTAATTCGTTAACGAACGAGACCTTAACCTGCTAAATAGTTA  
CACATAATTCCGGTTATGTGGGCAACTTCTTA

>IRL\_520

CAGGGCATCCATGTCTTGTAATTGGAATGAATGGAAATTAAACCTCTTTGTAAGTATCGATT  
GGAGGGCAAGTCTGGTGCCAGCAGCCGCGGTAATTCCAGCTCCAATAGCGTATATTAAGTT  
GTTGCGGTAAAAAGCTCGTAGTTGGATTTCTGCTAAGGGTGGCTGGTCCGCCCTCTGGGTG  
AGTATCTGGCACAACCTGAGCATCTTTCTGGAGAACGTAAGTGCACCTTGACTGTGTGGTGCG  
GTATCGAGAACTTTTACTTTGAGGAAATCAGAGTGTTTCAAGCAGGTGTTTGCCTTGAATAC

ATTAGCATGGAATAATAACATAGGACTTTGGTTCTATTTTGTGGTTTCTAGAACGAAAGTA  
ATGATTAATAGGGATAGTTGGGGGCATTCGTATTTAATTGTCAGAGGTGAAATTCTTGGATT  
TGTTGAAGACGGACTACTGCGAAAGCATTTGCCAAGGATGTTTTATTGATCAAGAACGAAA  
GTTAGGGGATCGAAGACGATCAGATACCGTCCTAGTCTTAACCATAAACCATGCCAACTAGA  
GATTGGAGGCCGTTATTTGTACGATTCCCTTCAGCACCTTATGAGAAATCGAAGTCTTTGGGT  
CCGGGGGGAGTATGGTCGCAAGGCTGAAACTTAAAGGAATTGACGGAAGGGCACCACCAGG  
AGTGGAGCCTGCGGCTTAATTTGACTCAACACGGGGAACTTACCAGGTCCAGACATAATTA  
GGATTGACAGATTGATAGCTCTTTCTTGATTCTATGGGTGGTGGTGCATGGCCGTTCTTAGTT  
GGTGGAGTGATTGTCTGGTTAATTCCGTTAACGAACGAGACCTTAACCTGCTAAATAGTTA  
CACATAATTCCGGTTATGTGGGCAACTTCTTA

>DQ500123.1 *Pyrodinium bahamense* var. *compressum* PYRO 18S

CAGGGCATCCATGTCTTGTAATTGGAATGAATGGAAATTAACCTCTTTGTAAGTATCGATT  
GGAGGGCAAGTCTGGTGCCAGCAGCCGCGGTAATTCCAGCTCCAATAGCGTATATTAAAGTT  
GTTGCGGTTAAAAAGCTCGTAGTTGGATTTCTGCTAAGGGTGGCTGGTCCGCCCTCTGGGTG  
AGTATCTGGCACAACCTGAGCATCTTTCTGGAGAACGTAAGTGCATTGACTGTGTGGTGCG  
GTATCGAGAACTTTTACTTTGAGGAAATCAGAGTGTTTCAAGCAGGTGTTTGCCTTGAATAC  
ATTAGCATGGAATAATAACATAGGACTTTGGTTCTATTTTGTGGTTTCTAGAACGAAAGTA  
ATGATTAATAGGGATAGTTGGGGGCATTCGTATTTAATTGTCAGAGGTGAAATTCTTGGATT  
TGTTGAAGACGGACTACTGCGAAAGCATTTGCCAAGGATGTTTTATTGATCAAGAACGAAA  
GTTAGGGGATCGAAGACGATCAGATACCGTCCTAGTCTTAACCATAAACCATGCCAACTAGA  
GATTGGAGGCCGTTATTTGTACGATTCCCTTCAGCACCT-

ATGAGAAATCGAAGTCTTTGGGTTCCGGGGGGAGTATGGTCGCAAGGCTGAAACTTAAAGG  
AATTGTCGGAAGGGCACCACCAGGAGTGGAGCCTGCGGCTTAATTTGACTCAACTCGGGGA  
AACTTACCAGGTCCAGACATAATTAGGATTGACAGATTGATAGCTCTTTCTTGATTCTATGG  
GTGGTGGTGCATGGCCGTTCTTAGTTGGTGGAGTGATTTGTCTGGTTAATTCCGTTAACGAAC  
GAGACCTTAACCTGCTAAATAGTTACACATAATTCCGGTTATGTGGGCAACTTCTTA

>DQ500119.1 *Pyrodinium bahamense* var. *compressum* isolate G1

CAGGGCATCCATGTCTTGTAATTGGAATGAATGGAAATTAACCTCTTTGTAAGTATCGATT  
GGAGGGCAAGTCTGGTGCCAGCAGCCGCGGTAATTCCAGCTCCAATAGCGTATATTAAAGTT  
GTTGCGGTTAAAAAGCTCGTAGTTGGATTTCTGCTAAGGGTGGCTGGTCCGCCCTCTGGGTG  
AGTATCTGGCACAACCTGAGCATCTTTCTGGAGAACGTAAGTGCATTGACTGTGTGGTGCG  
GTATCGAGAACTTTTACTTTGAGGAAATCAGAGTGTTTCAAGCAGGTGTTTGCCTTGAATAC  
ATTAGCATGGAATAATAACATAGGACTTTGGTTCTATTTTGTGGTTTCTAGAACGAAAATA  
ATGATTAATGGGGATAGTTGGGGGCATTCGTATTTAATTGTCAGAGGTGAAATTCTTGGATT  
TGTTGAAGACGGACTACTGCGAAAGCATTTGCCAAGGATGTTTTATTGATCAAGAACGAAA  
GTTAGGGGATCGAAGACGATCAGATACCGTCCTAGTCTTAACCATAAACCATGCCAACTAGA  
GATTGGAGGCCGTTATTTGTACGATTCCCTTCAGCACCTTATGAGAAATCGAAGTCTTTGGGT  
CCGGGGGGAGTATGGTCGCAAGGCTGAAACTTAAAGGAATTGACGGAAGGGCACCACCAGG  
AGTGGAGCCTGCGGCTTAATTTGACTCAACACGGGGAACTTACCAGGTCCAGACATAATTA  
GGATTGACAGATTGATAGCTCTTTCTTGATTCTATGGGTGGTGGTGCATGGCCGTTCTTAGTT  
GGTGGAGTGATTGTCTGGTTAATTCCGTTAACGAACGAGACCTTAACCTGCTAAATAGTTA  
CACATAATTCCGGTTATGTGGGCAACTTCTTA

>KX377183.1 *Pyrodinium bahamense* clone Pc-BRBD-1(1)-612

CAGGGCATCCATGTCTTGTAATTGGAATGAATGGAAATTAACCTCTTTGTAAGTATCGATT  
GGAGGGCAAGTCTGGTGCCAGCAGCCGCGGTAATTCCAGCTCCAATAGCGTATATTAAAGTT  
GTTGCGGTTAAAAAGCTCGTAGTTGGATTTCTGCTAAGGGTGGCTGGTCCACCCTCTGGGTG  
AGTATCTGGCACAACCTGAGCATCTTTCTGGAGAACGTAAGTGCATTGACTGTGTGGTGCG

GTATCGAGAACTTTTACTTTGAGGAAATCAGAGTGTTTCAAGCAGGTGTTTGCCTTGAATAC  
ATTAGCATGGAATAATAACATAGGACTTTGGTTCTATTTTGTGGTTTCTAGAACGAAAGTA  
ATGATTAATAGGGATAGTTGGGGGCATTCGTATTTAATTGTCAGAGGTGAAATTCTTGGATT  
TGTTGAAGACGGACTACTGCGAAAGCATTTGCCAAGGATGTTTTATTGATCAAGAACGAAA  
GTTAGGGGATCGAAGACGATCAGATACCGTCCTAGTCTTAACCATAAACCATGCCAACTAGA  
GATTGGAGGCCGTTATTTGTACGATTCCTTCAGCACCTTATGAGAAATCGAAGTCTTTGGGT  
CCGGGGGGAGTATGGTCGCAAGGCTGAAACTTAAAGGAATTGACGGAAGGGCACCACCAGG  
AGTGGAGCCTGCGGCTTAATTTGACTCAACACGGGGAACTTACCAGGTCAAGACATAATTA  
GGATTGACAGATTGATAGCTCTTTCTTGATTCTATGGGTGGTGGTGCATGGCCGTTCTTAGTT  
GGTGGAGTGATTTGTCTGGTTAATTCCGTTAACGAACGAGACCTTAACCTGCTAAATAGTTA  
CACATAATTCCGGTTATGCGGGCAACTTCTTA

>KX377182.1 Pyrodinium bahamense clone Pc-BR-3(1)-808

CAGGGCATCCATGTCTTGTAATTGGAATGAATGGAAATTAAACCTCTTTGTAAGTATCGATT  
GGAGGGCAAGTCTGGTGCCAGCAGCCGCGGTAATTCCAGCTCCAATAGCGTATATTAAAGTT  
GTTGCGGTTAAAAAGCTCGTAGTTGGATTTCTGCTAAGGGTGGCTGGTCCGCCCTCTGGGTG  
AGTATCTGGCACAACCTGAGCATCTTTCTGGAGAACGTAACCTGCACTTGACTGTGTGGTGCG  
GTATCGAGAACTTTTACTTTGAGGAAATCAGAGTGTTTCAAGCAGGTGTTTGCCTTGAATAC  
ATTAGCATGGAATAATAACATAGGACTTTGGTTCTATTTTGTGGTTTCTAGAACGAAAGTA  
ATGATTAATAGGGATAGTTGGGGGCATTCGTATTTAATTGTCAGAGGTGAAATTCTTGGATT  
TGTTGAAGACGGACTACTGCGAAAGCATTTGCCAAGGATGTTTTATTGATCAAGAACGAAA  
GTTAGGGGATCGAAGACGATCAGATACCGTCCTAGTCTTAACCATAAACCATGCCAACTAGA  
GATTGGAGGCCGTTATTTGTACGATTCCTTCAGCACCTTATGAGAAATCGAAGTCTTTGGGT  
CCGGGGGGAGTATGGTCGCAAGGCTGAAACTTAAAGGAATTGACGGAAGGGCACCACCAGG  
AGTGGAGCCTGCGGCTTAATTTGACTCAACACGGGGAACTTACCAGGTCCAGACATAATTA  
GGATTGACAGATTGATAGCTCTTTCTTGATTCTATGGGTGGTGGTGCATGGCCGTTCTTAGTT  
GGTGGAGTGATTTGTCTGGTTAATTCCGTTAACGAACGAGACCTTAACCTGCTAAATAGTTA  
CACATAACTCCGGTTATGTGGGCAACTTCTTA

>KX377196.1 Pyrodinium bahamense clone Pc-MB-2-1112

CAGG\_CATCCATGTCTTGTAATTGGAATGAATGGAAATTAAACCTCTTTGTAAGTATCGATTG  
GAGGGCAAGTCTGGTGCCAGCAGCCGCGGTAATTCCAGCTCCAATAGCGTATATTAAAGTTG  
TTGCGGTTAAAAAGCTCGTAGTTGGATTTCTGCTAAGGGTGGCTGGTCCGCCCTCTGGGTGA  
GTATCTGGCACAACCTGAGCATCTTTCTGGAGAACGTAACCTGCACTTGACTGTGTGGTGCGG  
TATCGAGAACTTTTACTTTGAGGAAATCAGAGTGTTTCAAGCAGGTGTTTGCCTTGAATACA  
TTAGCATGGAATAATAACATAGGACTTTGGTTCTATTTTGTGGTTTCTAGAACGAAAGTAAT  
GATTAATAGGGATAGTTGGGGGCATTCGTATTTAATTGTCAGAGGTGAAATTCTTGGATTTG  
TTGAAGACGGACTACTGCGAAAGCATTTGCCAAGGATGTTTTATTGATCAAGAACGAAAGT  
TAGGGGATCGAAGACGATCAGATACCGTCCTAGTCTTAACCATAAACCATGCCAACTAGAG  
ATTGGAGGCCGTTATTTGTACGATTCCTTCAGCACCTTATGAGAAATCGAAGTCTTTGGGTTC  
CGGGGGGAGTATGGTCGCAAGGCTGAAACTTAAAGGAATTGACGGAAGGGCACCACCAGG  
AGTGGAGCCTGCGGCTTAATTTGACTCAACACGGGGAACTTACCAGGTCCAGACATAATTA  
GGATTGACAGATTGATAGCTCTTTCTTGATTCTATGGGTGGTGGTGCATGGCCGTTCTTAGTT  
GGTGGAGTGATTTGTCTGGTTAATTCCGTTAACGAACGAGACCTTAACCTGCTAAATAGTTA  
CACATAATTCCGGTTATGTGGGCAACTTCTTA
